# Supplementary figures and images for: Dual-Portal Robotic-Assisted Thoracic Surgery (DRATS) and Indocyanine Green-Navigated Segmentectomy
Source: Preprints.org preprint supplement (doi:10.20944/preprints202405.1106.v1), 2024-05-16

**Supplementary Materials**


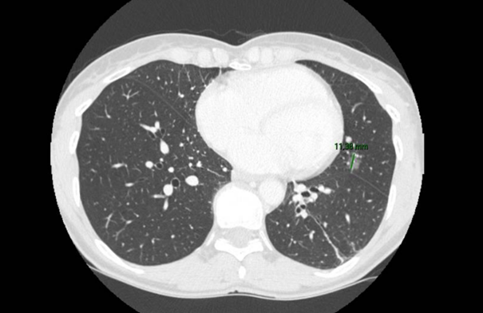


**Figure S1.** pre operative CT scan.


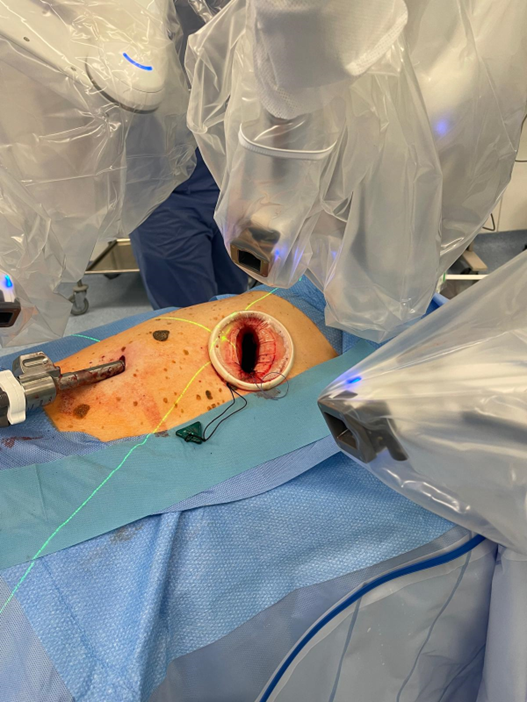


**Figure S2.** Incision and docking.

Supplement: Supplementary file 1 [file supplementary]
